# Supplementary material for: Broussonetia papyrifera Polysaccharide Alleviated Acetaminophen-Induced Liver Injury by Regulating the Intestinal Flora
Source: MDPI journal article supplement (doi:10.3390/nu14132636), 2022-06-25
Supplement: s1 [file s1]

## Supplementary Materials

Figure S1:

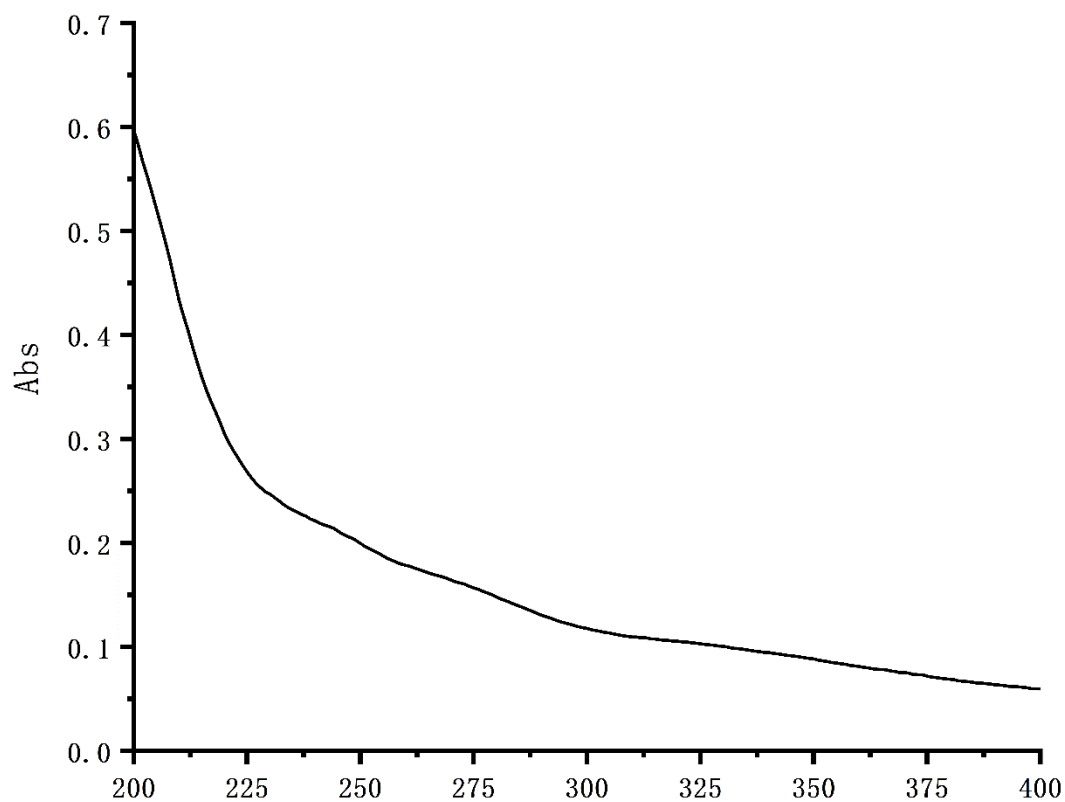

Figure S1 UV scanning spectrum of BPP

Table S1

Table S1. Effect of BPP on liver index in mice

| Groups | Body weight (g)          | Liver weight (g)       | Liver index (%)        |
|--------|--------------------------|------------------------|------------------------|
| CON    | 27.75±1.74 <sup>b</sup>  | 1.24±0.08 <sup>b</sup> | 4.46±0.25 <sup>b</sup> |
| APAP   | 23.6±1.33 <sup>c</sup>   | 1.59±0.16 <sup>a</sup> | 6.73±0.55 <sup>a</sup> |
| PD     | 27.89±1.82 <sup>b</sup>  | 1.22±0.12 <sup>b</sup> | 4.39±0.25 <sup>b</sup> |
| L-BPP  | 30.29±2.46 <sup>ab</sup> | 1.44±0.12 <sup>a</sup> | 4.77±0.6 <sup>b</sup>  |
| M-BPP  | 33.16±3.34 <sup>a</sup>  | 1.54±0.22 <sup>a</sup> | 4.63±0.3 <sup>b</sup>  |
| H-BPP  | 31.38±1.32 <sup>a</sup>  | 1.38±0.1 <sup>b</sup>  | 4.41±0.16 <sup>b</sup> |

Different data markers in the same column indicate significant differences ( $p < 0.05$ )

Table S2

Table S2 Alpha diversity index table

| Groups  | CON                        | APAP                       | H-BPP                      |
|---------|----------------------------|----------------------------|----------------------------|
| sobs    | 318.14±43.017 <sup>b</sup> | 303.57±25.98 <sup>b</sup>  | 331.43±34.534 <sup>a</sup> |
| ace     | 374.71±41.166 <sup>a</sup> | 345.34±35.104 <sup>a</sup> | 385.6±34.344 <sup>a</sup>  |
| shannon | 3.221±0.626 <sup>b</sup>   | 3.827±0.206 <sup>a</sup>   | 3.493±0.543 <sup>b</sup>   |
| simpson | 0.124±0.075 <sup>a</sup>   | 0.055±0.01 <sup>b</sup>    | 0.088±0.051 <sup>a</sup>   |

Table S3

Table S3. Effect of FMT on liver index in mice

| Groups | Body weight (g)          | Liver weight (g)       | Liver index (%)        |
|--------|--------------------------|------------------------|------------------------|
| CON    | 29.73±2.17 <sup>b</sup>  | 1.37±0.09 <sup>c</sup> | 4.6±0.1 <sup>c</sup>   |
| APAP   | 27.75±0.91 <sup>a</sup>  | 1.73±0.05 <sup>a</sup> | 6.23±0.1 <sup>a</sup>  |
| ABX    | 27.28±0.76 <sup>a</sup>  | 1.63±0.08 <sup>b</sup> | 5.99±0.31 <sup>a</sup> |
| FMT    | 28.13±1.51 <sup>ab</sup> | 1.48±0.12 <sup>c</sup> | 5.25±0.32 <sup>b</sup> |

Different data markers in the same column indicate significant differences ( $p < 0.05$ )

Table S4

Table S4. Effect of BPP on liver index in pseudo sterile mice

| Groups  | Body weight (g)         | Liver weight (g)       | Liver index (%)        |
|---------|-------------------------|------------------------|------------------------|
| CON     | 29.73±2.17 <sup>a</sup> | 1.37±0.09 <sup>a</sup> | 4.6±0.1 <sup>b</sup>   |
| ABX     | 28.18±0.76 <sup>a</sup> | 1.63±0.08 <sup>b</sup> | 5.8±0.3 <sup>a</sup>   |
| ABX-BPP | 27.54±1.39 <sup>b</sup> | 1.6±0.12 <sup>b</sup>  | 5.83±0.46 <sup>a</sup> |

Different data markers in the same column indicate significant differences ( $p < 0.05$ )
